# Supplementary material for: Magnetic NiO nanoparticles confined within open ends MWCNTs: a novel and highly active catalyst for hydrogenation and synthesis of imines
Source: Royal Society of Chemistry journal article supplement (doi:10.1039/c6ra05561c), 2016-01-01
Supplement: c6ra05561c1.pdf [file c6ra05561c1.pdf]

## Supporting Information

### Magnetic Ni Nanoparticles Confined within Open Ends MWCNTs: A Novel and Highly Active Catalyst for Hydrogenation and Synthesis of Imines

Gangquan Chen<sup>1</sup>, Wenbin Gao<sup>2</sup>, Xuejun Wang<sup>3</sup>, Hongfei Huo<sup>2</sup>, Wenzhu Li<sup>2</sup>, Le Zhang<sup>2</sup>, Rong Li<sup>2</sup> and Zuixiong Li<sup>1\*</sup>

#### Results and discussion

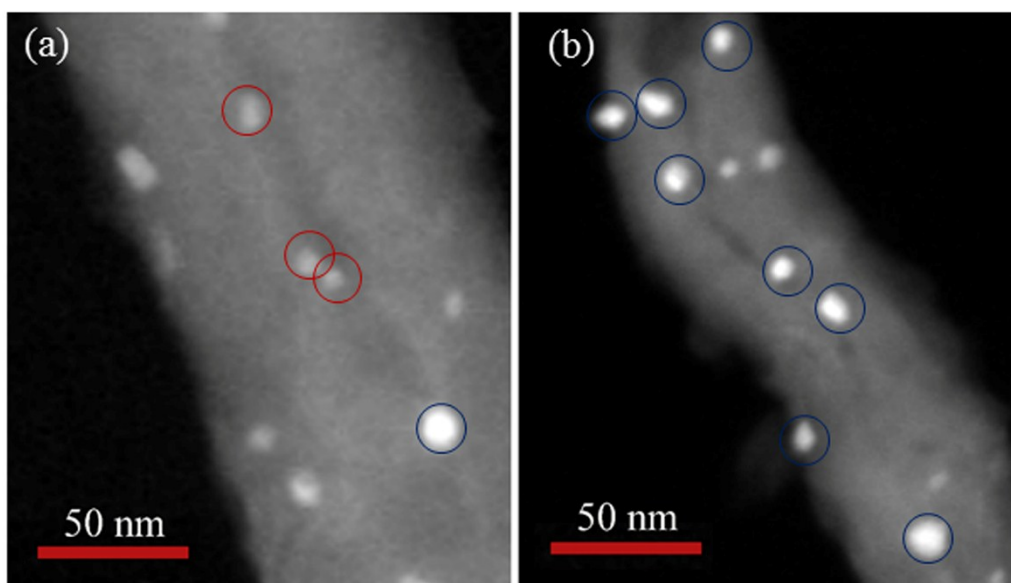

Figure S1 The high angle annular dark field-scanning transmission electron microscopy (HAADF-STEM) image of (a) NiO/MWCNTs-in and (b) NiO/MWCNTs-out.

Figure S1 shows the The high angle annular dark field-scanning transmission electron microscopy (HAADF-STEM) image of NiO/MWCNTs-in and NiO/MWCNTs-out. Because of the influence of the carbon nanotubes, the NiO nanoparticles immobilized outside the MWCNTs are brighter than the NiO nanoparticles confined inside the MWCNTs. From Figure S1(a) We can clearly see that most of the NiO (in the red circles) are filled in the MWCNTs. But, in Figure S1(a) most of NiO nanoparticles are deposited on the MWCNTs (in the blue circles).
